# Supplementary material for: Pharmaceutically modified subtilisins withstand acidic conditions and effectively degrade gluten in vivo
Source: PubMed Central journal article supplement (PMC6522598; doi:10.1038/s41598-019-43837-9), 2019-05-16
Supplement: 41598_2019_43837_MOESM1_ESM.pdf [file 41598_2019_43837_MOESM1_ESM.pdf]

Supplementary information

**Pharmaceutically modified subtilisins withstand acidic conditions and effectively degrade gluten *in vivo***

Ghassan Darwish<sup>1</sup>, Eva J. Helmerhorst<sup>1</sup>, Detlef Schuppan<sup>2,3</sup>, Frank G. Oppenheim<sup>1</sup>, Guoxian Wei<sup>1\*</sup>

<sup>1</sup>Department of Molecular and Cell Biology, Henry M. Goldman School of Dental Medicine  
700 Albany Street, Boston, Massachusetts

<sup>2</sup>Division of Gastroenterology, Beth Israel Deaconess Medical Center, Harvard Medical School, Boston, Massachusetts; and

<sup>3</sup>Institute of Translational Immunology and Research Center for Immune Therapy, University Medical Center, Johannes-Gutenberg-University, Mainz, Germany

\* Corresponding author:

Guoxian Wei, M.S., Ph.D.

Dept. of Molecular and Cell Biology

Boston University, Henry M. Goldman School of Dental Medicine

700 Albany Street, CABR W202B

Boston, MA 02118

Phone: 617-638-4916

Fax: 617-638-4924

Email: [weigx@bu.edu](mailto:weigx@bu.edu)

**(A) Fluorescamine**

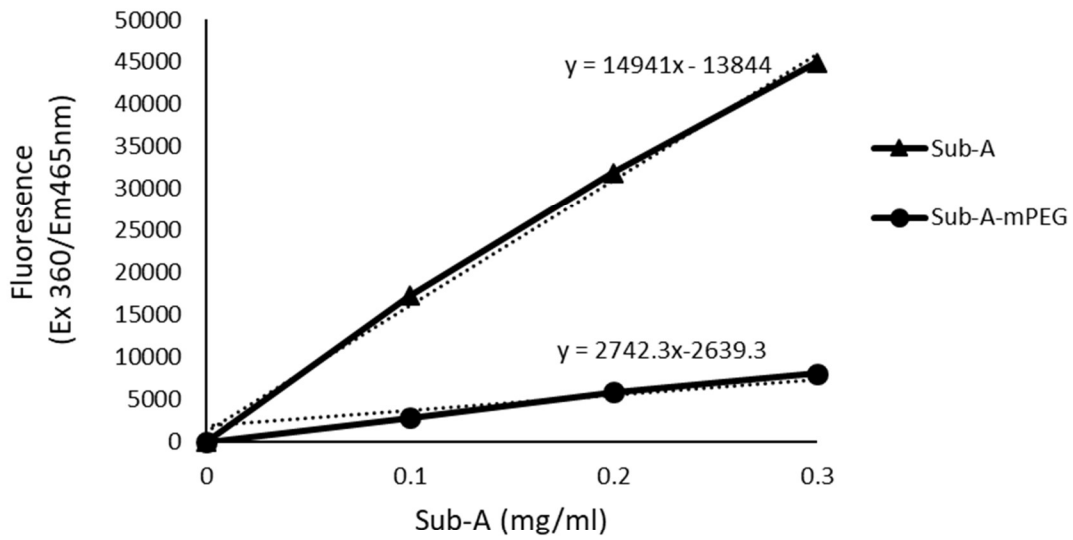

**(B) TNBSA**

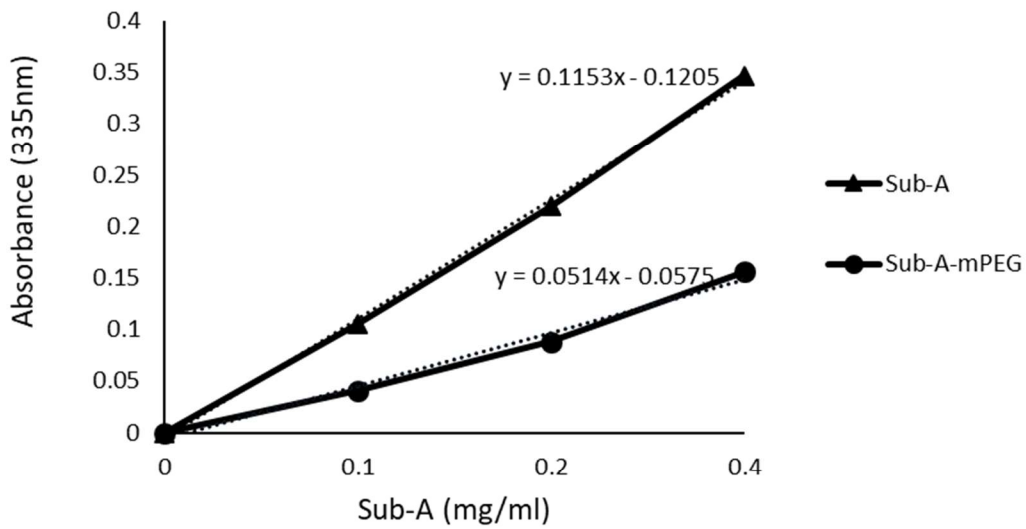

**Supplemental Figure 1.** Assessment of the extent of Sub-A PEGylation by (A) fluorescamine methods and (B) the TNBSA method, n=3.

**Supplemental Table 1.** Validation of PEGylation of Subtilisin-A (Sub-A) with Two Methods

| Methods               | (A) Fluorescamine               | (B) TNBS                          |
|-----------------------|---------------------------------|-----------------------------------|
| Target                | Primary amine in folded protein | Primary amine in unfolded protein |
| Measurement           | Fluorescent compound            | Chromogenic product               |
| Slope of Sub-A        | 14941                           | 0.1153                            |
| Slope of Sub-A-mPEG   | 2742.3                          | 0.0514                            |
| mPEG modification (%) | 81.64                           | 55.42                             |
| *PEGylated amines     | ~8                              | ~6                                |

\*Number of primary amines in Sub-A is 10.

The data shown are representative of experiments conducted in triplicate.

**Supplemental Table 2.** Modification of Subtilisin-A (Sub-A)

|                   | Before modification (mg) | After modification (mg) | Yield (%) | Sub-A Conc. (% w/w) |
|-------------------|--------------------------|-------------------------|-----------|---------------------|
| Sub-A + mPEG      | 40+120=160               | 116.6                   | ~73       | ~34                 |
| Sub-A-mPEG + PLGA | 10+90=100                | 43.3                    | ~43       | ~8                  |

The data shown are representative of experiments conducted in triplicate.
